# Supplementary material for: Why Are Clinicians Not Embracing the Results from Pivotal Clinical Trials in Severe Sepsis? A Bayesian Analysis
Source: PLoS One. 2008 May 28;3(5):e2291. doi: 10.1371/journal.pone.0002291 (PMC2384005; doi:10.1371/journal.pone.0002291)
Supplement: Appendix S1 — (0.05 MB DOC) [file pone.0002291.s001.doc]

**APPENDIX S1**

**METHODS:**

**A. Methods Description:**

1. **What is the current probability that the new therapy is not better than the standard of care in my patient with severe sepsis?**

Let **1 be the ln(OR) of death for the new treatment group compared to the control group. We used the estimate of **1 and its variance ( and ) based on adjusted OR (provided by logistic regression) whenever possible. Otherwise, let *a* and *b* be the numbers of death, *c* and *d* be the numbers of patients who survived in the treatment group and the control group, respectively. Let It is well-known that the estimate of **1 and its variance are and , and has approximate normal distribution with mean **1 and variance [93]. Assume the prior distribution of **1 be normal with mean 0 and variance *p*12. Then it is easy to show [94] that the posterior distribution of **1 is

(1)

We can then calculate the posterior probability of the new treatment being no better than the control (ln(OR) > -0.05).

The prior distribution was chosen based on the effective sample size of prior clinical trials. Similar to Spiegelhalter, et al [94], we assume the hypothetical prior trial have equal sample size *n* and equal event rate *p* in both arms. Then it is easy to show that

(2)

Replacing *p* with the observed overall mortality rate for the control arm of the current trial, we can specify *p*12 based on the effective sample size (2*n*) of prior trials.

1. **What is the current probability of decreasing the relative risk of death of my patient with severe sepsis by a meaningful clinical threshold?**

We consider the log-transformed relative risk (ln(RR)) of death for the treatment group compared to the control group, calculated from the observed numbers of deaths from each trial. The parameter of interest **2 = ln(RR). The estimate of **2 and its variance based on the data are and , and has approximate normal distribution with mean **2 and variance for large trials [93]. Assume the prior distribution of **2be normal with mean 0 and variance *p*22. Similar to the first analysis, we defined non-informative and skeptic prior distributions based on the effective sample sizes of prior trials. Again assuming the prior trial have equal sample size *n* and equal event rate *p* in both arms, it is easy to show that

(3)

Replacing *p* with the observed mortality rate for the control arm of the current trial, we can specify *p*12 based on the effective sample size (2*n*) of prior trials. We then derive the posterior distribution of **2 from Equation (1), using instead of . Then we can easily calculate the posterior probability of RRR being greater than a specific clinically meaningful cut-off.
